# Supplementary material
Source: PubMed Central journal article supplement (PMC10482069)
Supplement: jasn-34-1535-s001.pdf [file jasn-34-1535-s001.pdf]

## **Table of contents:**

**Page 2. Supplemental Table 1.** Comparison of measures of nephron size in three cortical depths.

**Page 3. Supplemental Table 2.** Spearman correlations of diameters of proximal and distal tubules and glomerular volume by cortex depth.

**Page 4. Supplemental Table 3.** Measures of nephron size (using glomerular diameter rather than volume) as predictors of progressive CKD from 4 months following a radical nephrectomy.

## Supplemental Tables

**Supplemental Table 1.** Comparison of measures of nephron size in three cortical depths.

|                                    | Cortical Depths |                 |                 | P value |
|------------------------------------|-----------------|-----------------|-----------------|---------|
|                                    | Superficial     | Middle          | Deep            |         |
| Glomerular volume, mm <sup>3</sup> | 0.0025 (0.0011) | 0.0032 (0.0012) | 0.0029 (0.0011) | <0.0001 |
| Proximal tubular diameter, $\mu$ m | 54.2 (6.4)      | 58.1 (6.6)      | 56.6 (6.5)      | <0.0001 |
| Distal tubular diameter, $\mu$ m   | 43.1 (4.4)      | 46.9 (4.7)      | 47.2 (5.0)      | <0.0001 |

Data are presented as Mean (SD).

**Supplemental Table 2.** Spearman correlations of diameters of proximal and distal tubules and glomerular volume by cortex depth.

|                          | Mean Proximal Tubular Diameter |                   |                      |                   |                      |                   | Mean Distal Tubular Diameter |                   |                      |                   |                      |                   |
|--------------------------|--------------------------------|-------------------|----------------------|-------------------|----------------------|-------------------|------------------------------|-------------------|----------------------|-------------------|----------------------|-------------------|
|                          | Superficial Cortex             |                   | Middle Cortex        |                   | Deep Cortex          |                   | Superficial Cortex           |                   | Middle Cortex        |                   | Deep Cortex          |                   |
|                          | <b>R<sub>s</sub></b>           | <b>P Value</b>    | <b>R<sub>s</sub></b> | <b>P Value</b>    | <b>R<sub>s</sub></b> | <b>P Value</b>    | <b>R<sub>s</sub></b>         | <b>P Value</b>    | <b>R<sub>s</sub></b> | <b>P Value</b>    | <b>R<sub>s</sub></b> | <b>P Value</b>    |
| <b>Glomerular volume</b> |                                |                   |                      |                   |                      |                   |                              |                   |                      |                   |                      |                   |
| Superficial Cortex       | <b>0.49</b>                    | <b>&lt;0.0001</b> | <b>0.44</b>          | <b>&lt;0.0001</b> | <b>0.38</b>          | <b>&lt;0.0001</b> | <b>0.43</b>                  | <b>&lt;0.0001</b> | <b>0.37</b>          | <b>&lt;0.0001</b> | <b>0.33</b>          | <b>&lt;0.0001</b> |
| Middle Cortex            | <b>0.49</b>                    | <b>&lt;0.0001</b> | <b>0.53</b>          | <b>&lt;0.0001</b> | <b>0.47</b>          | <b>&lt;0.0001</b> | <b>0.43</b>                  | <b>&lt;0.0001</b> | <b>0.43</b>          | <b>&lt;0.0001</b> | <b>0.39</b>          | <b>&lt;0.0001</b> |
| Deep Cortex              | <b>0.40</b>                    | <b>&lt;0.0001</b> | <b>0.44</b>          | <b>&lt;0.0001</b> | <b>0.48</b>          | <b>&lt;0.0001</b> | <b>0.33</b>                  | <b>&lt;0.0001</b> | <b>0.36</b>          | <b>&lt;0.0001</b> | <b>0.40</b>          | <b>&lt;0.0001</b> |

**Supplemental Table 3.** Measures of nephron size (using glomerular diameter rather than volume) as predictors of progressive CKD from 4 months following a radical nephrectomy. There were 62 events.

| Predictor (per SD)        | Unadjusted                  |                   | Glomerular diameter and proximal tubular diameter (Model 2) |                   | Glomerular diameter and distal tubular diameter (Model 3) |                   | Model 3 further adjusted for clinical characteristics* |                   |
|---------------------------|-----------------------------|-------------------|-------------------------------------------------------------|-------------------|-----------------------------------------------------------|-------------------|--------------------------------------------------------|-------------------|
|                           | HR (95% CI)                 | P value           | HR (95% CI)                                                 | P value           | HR (95% CI)                                               | P value           | HR (95% CI)                                            | P value           |
| <b>Superficial depth</b>  |                             |                   |                                                             |                   |                                                           |                   |                                                        |                   |
| Glomerular diameter       | <b>2.00</b><br>(1.63, 2.46) | <b>&lt;0.0001</b> | <b>1.87</b><br>(1.44, 2.42)                                 | <b>&lt;0.0001</b> | <b>1.46</b><br>(1.14, 1.87)                               | <b>0.002</b>      | <b>1.31</b><br>(1.00, 1.72)                            | <b>0.047</b>      |
| Proximal tubular diameter | <b>1.63</b><br>(1.30, 2.04) | <b>&lt;0.0001</b> | 1.13<br>(0.85, 1.50)                                        | 0.39              | ---                                                       | ---               | ---                                                    | ---               |
| Distal tubular diameter   | <b>2.25</b><br>(1.83, 2.78) | <b>&lt;0.0001</b> | ---                                                         | ---               | <b>1.87</b><br>(1.46, 2.39)                               | <b>&lt;0.0001</b> | <b>1.78</b><br>(1.36, 2.32)                            | <b>&lt;0.0001</b> |
| <b>Middle depth</b>       |                             |                   |                                                             |                   |                                                           |                   |                                                        |                   |
| Glomerular diameter       | <b>2.07</b><br>(1.67, 2.57) | <b>&lt;0.0001</b> | <b>2.36</b><br>(1.78, 3.13)                                 | <b>&lt;0.0001</b> | <b>1.75</b><br>(1.36, 2.25)                               | <b>&lt;0.0001</b> | <b>1.65</b><br>(1.23, 2.21)                            | <b>0.0008</b>     |
| Proximal tubular diameter | <b>1.31</b><br>(1.04, 1.66) | <b>0.02</b>       | 0.80<br>(0.59, 1.08)                                        | 0.14              | ---                                                       | ---               | ---                                                    | ---               |
| Distal tubular diameter   | <b>1.82</b><br>(1.48, 2.24) | <b>&lt;0.0001</b> | ---                                                         | ---               | <b>1.41</b><br>(1.10, 1.82)                               | <b>0.007</b>      | <b>1.31</b><br>(1.01, 1.71)                            | <b>0.04</b>       |
| <b>Deep depth</b>         |                             |                   |                                                             |                   |                                                           |                   |                                                        |                   |
| Glomerular diameter       | <b>2.01</b><br>(1.64, 2.47) | <b>&lt;0.0001</b> | <b>1.93</b><br>(1.51, 2.48)                                 | <b>&lt;0.0001</b> | <b>1.88</b><br>(1.49, 2.37)                               | <b>&lt;0.0001</b> | <b>1.67</b><br>(1.32, 2.13)                            | <b>&lt;0.0001</b> |
| Proximal tubular diameter | <b>1.54</b><br>(1.23, 1.94) | <b>0.0002</b>     | 1.09<br>(0.82, 1.44)                                        | 0.56              | ---                                                       | ---               | ---                                                    | ---               |
| Distal tubular diameter   | <b>1.60</b><br>(1.25, 2.04) | <b>0.0002</b>     | ---                                                         | ---               | 1.19<br>(0.91, 1.57)                                      | 0.20              | 1.13<br>(0.85, 1.50)                                   | 0.41              |

\*Adjusted for age, sex, BMI, hypertension, diabetes, postnephrectomy baseline eGFR and proteinuria.
